# Supplementary material for: Distribution and controlling factors of microplastics in surface sediments of typical deep-sea geomorphological units in the northern South China Sea
Source: Frontiers journal article supplement (doi:10.3389/fmars.2022.1047078), 2022-12-08
Supplement: Data_Sheet_1.pdf [file Data_Sheet_1.pdf]

## Supplementary Material

### Distribution and Controlling Factors of Microplastics in Surface Sediments of Typical Deep-Sea Geomorphological Units in the Northern South China Sea

Xiaodong Zhang<sup>1</sup>, Zhifei Liu<sup>1</sup>\*, Yulong Zhao<sup>1</sup>, Pengfei Ma<sup>1</sup>, Christophe Colin<sup>2</sup>, Andrew Tien-Shun Lin<sup>3</sup>

<sup>1</sup> State Key Laboratory of Marine Geology, Tongji University, Shanghai 200092, China

<sup>2</sup> GEOPS, CNRS, Université Paris-Saclay, Orsay 91405, France

<sup>3</sup> Department of Earth Sciences, National Central University, Taoyuan 32001, Taiwan

\* Corresponding author. E-mail address: lzhifei@tongji.edu.cn

This document includes two tables and five figures with the following contents:

Table S1. Recovery rate of the microplastic spikes for laboratory analysis

Table S2. Type, abundance, and particle size of microplastics in the typical deep-sea geomorphological units of the northern South China Sea

Figures S1–S2. FT-IR spectra and photographs of typical microplastic particles

Figure S3. Photographs of all detected microplastics

Figure S4. Grain size frequency distribution of the detrital sediments

Figure S5. Pearson correlation analyses for the abundance of microplastics with the mean grain size of detrital sediments

Figure S6. Particle size distribution of microplastic fragments, fibers, and beads

Figure S7. Pearson correlation analyses for the particle size of microplastics with the mean grain size of detrital sediments

**Table S1.** Type, characteristic, and recovery rate of the microplastic spikes for laboratory analysis

| Microplastic type | Shape    | Particle size (mm) | Density (g·cm <sup>-3</sup> ) | Number of spikes | Number of recovered spikes | Recovery rate (%) |
|-------------------|----------|--------------------|-------------------------------|------------------|----------------------------|-------------------|
| PVC               | fragment | 1.00–2.00          | ~1.38                         | 20               | 20                         | 100.0±0.0         |
|                   |          |                    |                               | 20               | 20                         |                   |
|                   |          |                    |                               | 20               | 20                         |                   |
| PS                | bead     | 0.90–1.00          | ~0.62                         | 20               | 19                         | 98.3±2.9          |
|                   |          |                    |                               | 20               | 20                         |                   |
|                   |          |                    |                               | 20               | 20                         |                   |
| PE                | bead     | 0.25–0.30          | ~1.05                         | 20               | 19                         | 98.3±2.9          |
|                   |          |                    |                               | 20               | 20                         |                   |
|                   |          |                    |                               | 20               | 20                         |                   |

**Table S2.** Type, abundance, and particle size of microplastics in the typical deep-sea geomorphological units of the northern South China Sea

|                                        | <b>MD18-3558</b>     | <b>MD18-3572</b>    | <b>FC3-1</b>           | <b>MD18-3562</b>     | <b>SD-A3-1</b>                | <b>MD18-3564</b>       | <b>SW-B-4</b>            |
|----------------------------------------|----------------------|---------------------|------------------------|----------------------|-------------------------------|------------------------|--------------------------|
| Geomorphological units                 | Gaoping canyon levee | Penghu canyon levee | Formosa canyon channel | Gaoping canyon levee | Sediment drift on lower slope | Gaoping canyon sandbar | Sand dune on upper slope |
| Mean grain size ( $\times 10^{-3}$ mm) | 12.27                | 12.64               | 14.42                  | 18.57                | 25.27                         | 70.07                  | 349.78                   |
| Total abundance ( $p \cdot kg^{-1}$ )  | 39                   | 198                 | 408                    | 38                   | 174                           | 402                    | 694                      |
| Number of type (n)                     | 1                    | 3                   | 4                      | 2                    | 1                             | 5                      | 4                        |
| PC+PVC ( $p \cdot kg^{-1}$ )           | 0                    | 0                   | 45                     | 0                    | 174                           | 247                    | 347                      |
| PE+PP ( $p \cdot kg^{-1}$ )            | 0                    | 132                 | 227                    | 19                   | 0                             | 62                     | 217                      |
| PES ( $p \cdot kg^{-1}$ )              | 39                   | 0                   | 136                    | 19                   | 0                             | 31                     | 87                       |
| Mean value ( $p \cdot kg^{-1}$ )       | 13                   | 44                  | 136                    | 13                   | 58                            | 113                    | 217                      |
| Fragment ( $p \cdot kg^{-1}$ )         | 0                    | 132                 | 227                    | 0                    | 174                           | 340                    | 564                      |
| Fiber ( $p \cdot kg^{-1}$ )            | 39                   | 0                   | 181                    | 38                   | 0                             | 31                     | 130                      |
| Bead ( $p \cdot kg^{-1}$ )             | 0                    | 66                  | 0                      | 0                    | 0                             | 31                     | 0                        |
| Mean value ( $p \cdot kg^{-1}$ )       | 13                   | 66                  | 136                    | 13                   | 58                            | 134                    | 231                      |
| Mean fragment size (mm)                |                      | 0.65                | 1.16                   |                      | 1.26                          | 0.48                   | 0.55                     |
| Mean fiber size (mm)                   | 0.31                 |                     | 1.05                   | 0.59                 |                               | 0.76                   | 3.42                     |
| Mean bead size (mm)                    |                      | 0.09                |                        |                      |                               | 0.09                   |                          |
| Mean particle size (mm)*               | 0.31                 | 0.47                | 1.11                   | 0.59                 | 1.26                          | 0.48                   | 1.09                     |

\*The mean particle size is the averaged size of all microplastic particles (fragments, fibers, and beads) in each sample.

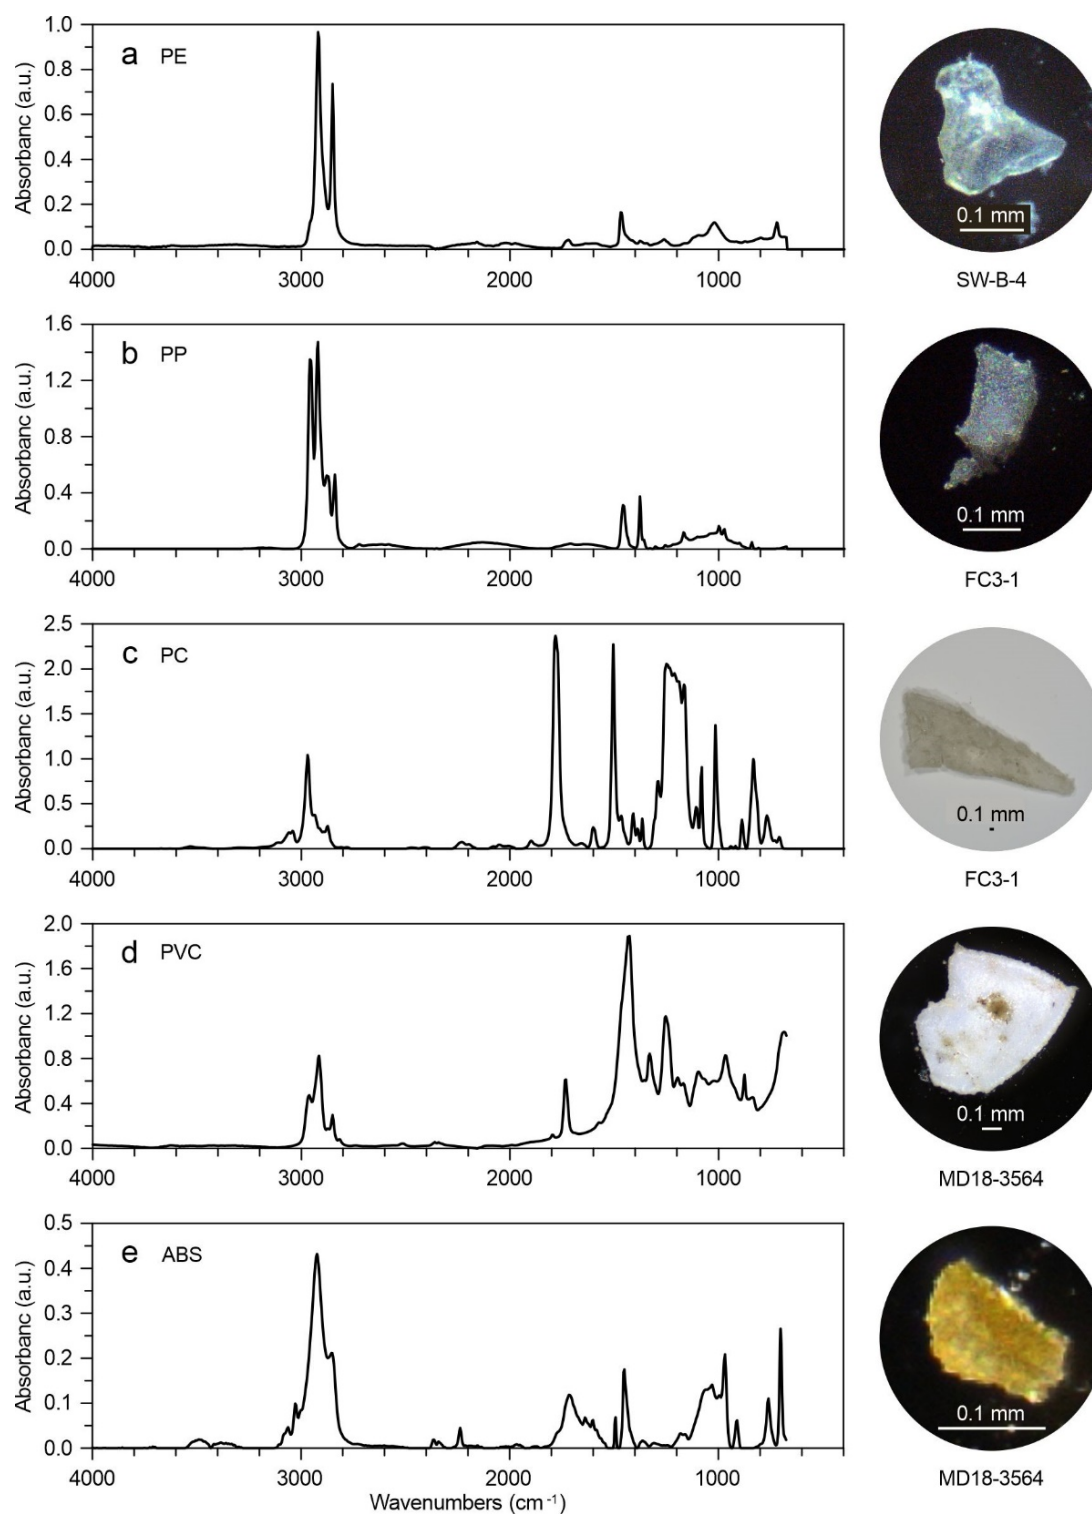

**Figure S1.** FTIR spectra and photographs of typical microplastic fragments in surface sediments of the northern South China Sea.

(a) PE in sample SW-B-4. (b) PP and (c) PC in sample FC3-1. (d) PVC and (e) ABS in sample MD18-3564.

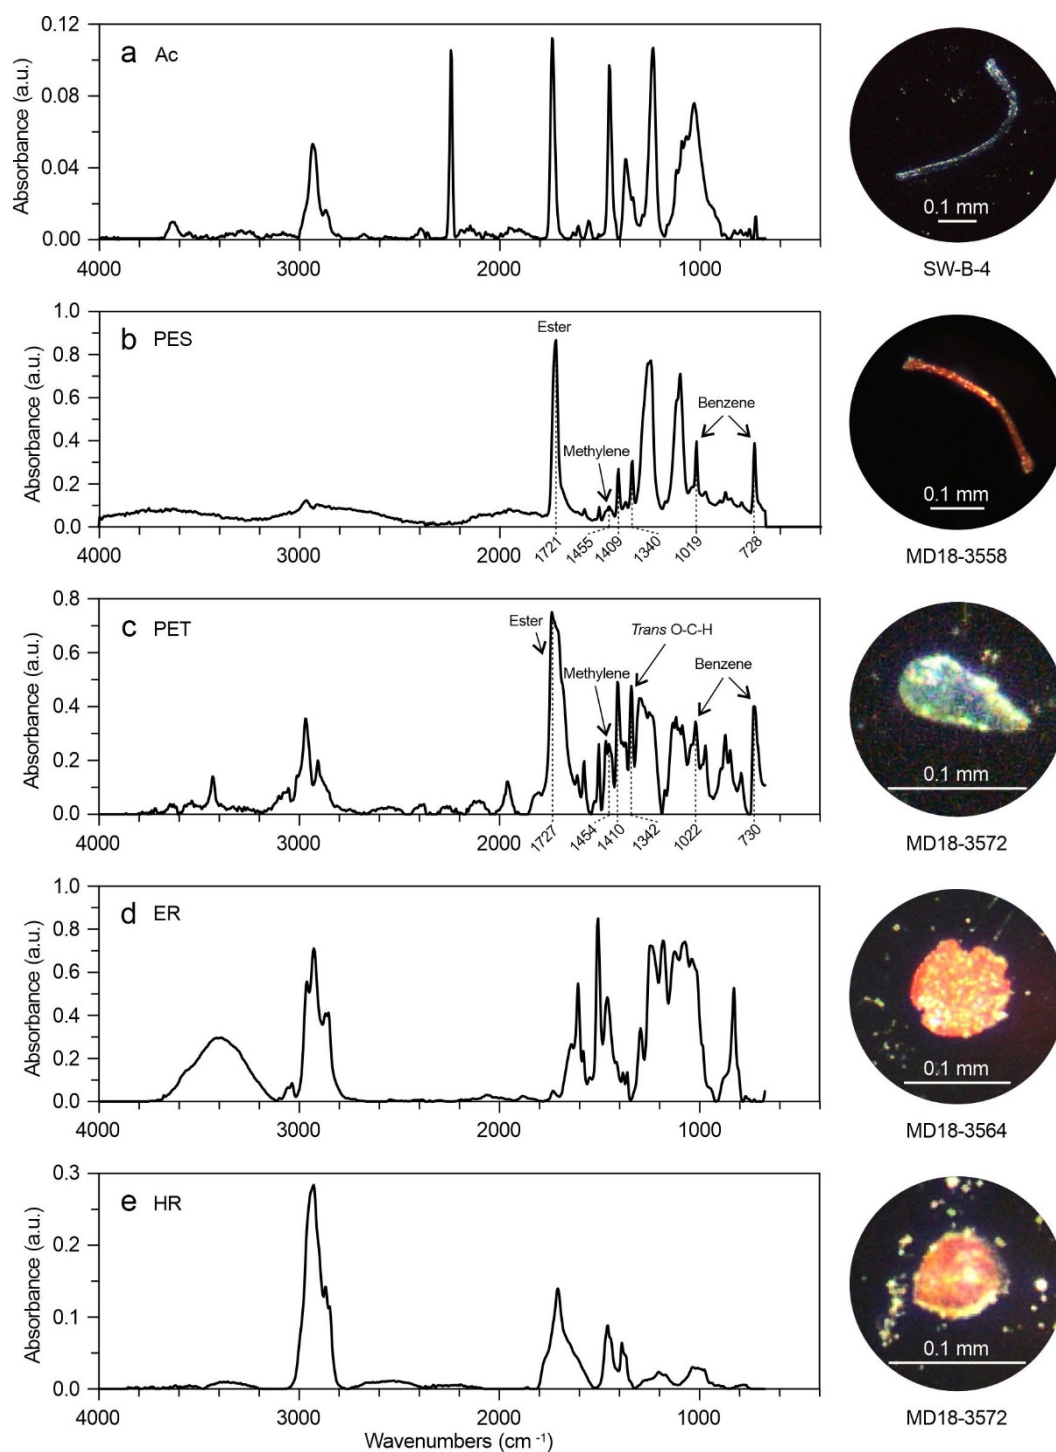

**Figure S2.** FTIR spectra and photographs of typical microplastic fibers and beads in surface sediments of the northern South China Sea.

(a) Ac in sample SW-B-4. (b) PES in sample MD18-3558. PES (polyester fiber) appeared as a fiber and contained the ester group (band at  $1727\text{ cm}^{-1}$ ), *gauche* methylene (band at  $1455\text{ cm}^{-1}$ ), and benzene ring (bands at  $1049$ ,  $1019$ , and  $728\text{ cm}^{-1}$ ). (c) PET in sample MD18-3572. PET (polyethylene terephthalate resin) appeared as a bead and had a typical *trans* conformer of the O-C-H bond (band at  $1342\text{ cm}^{-1}$ ). (d) ER in sample MD18-3564. (e) HR in sample MD18-3572.

SW-B-4

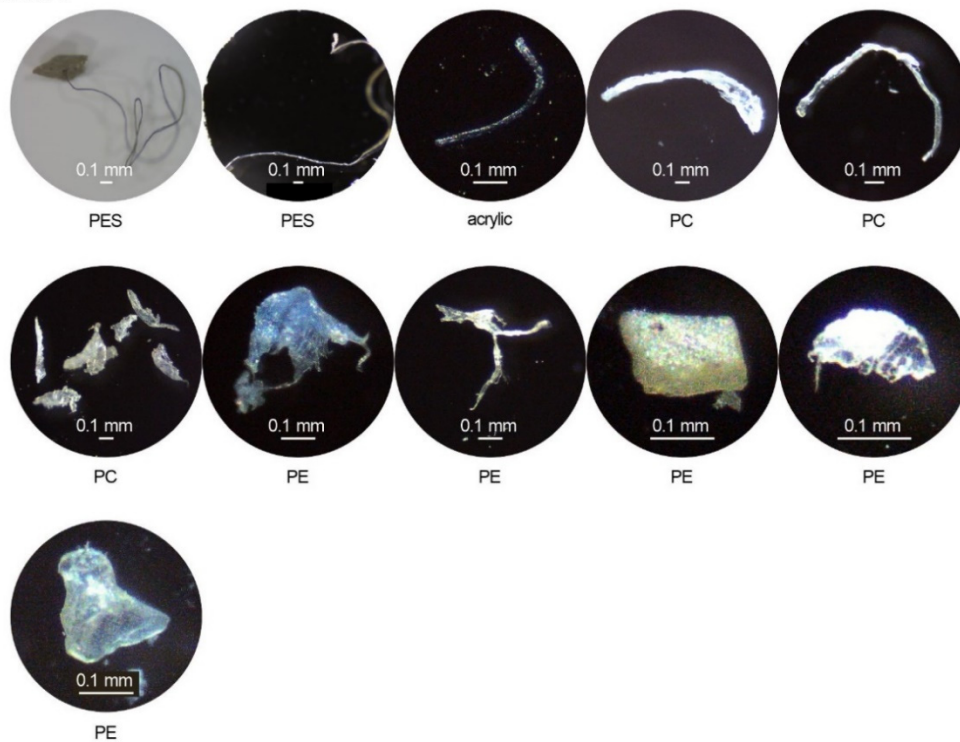

SD-A3-1

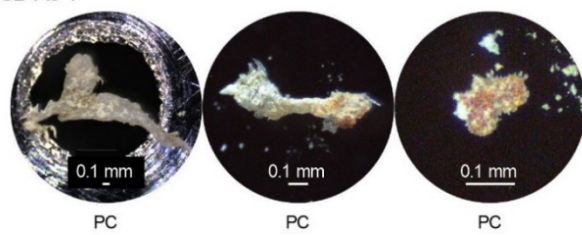

FC3-1

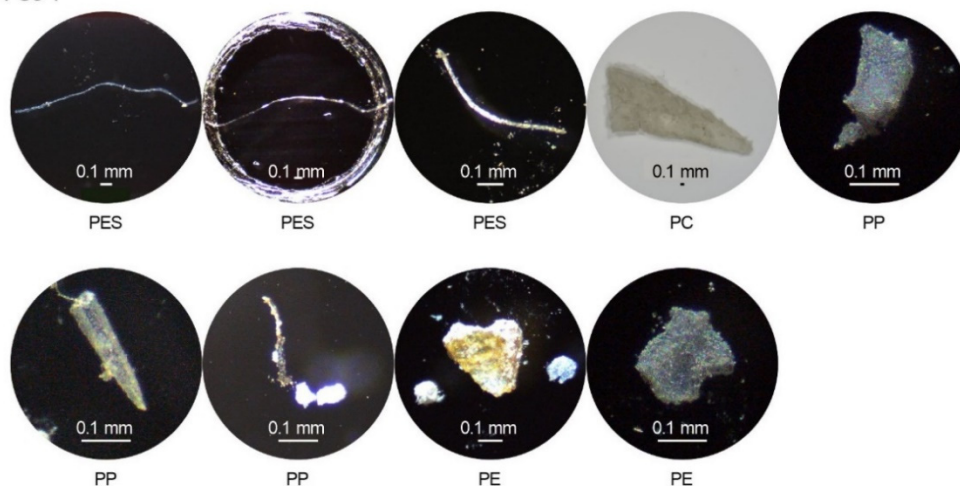

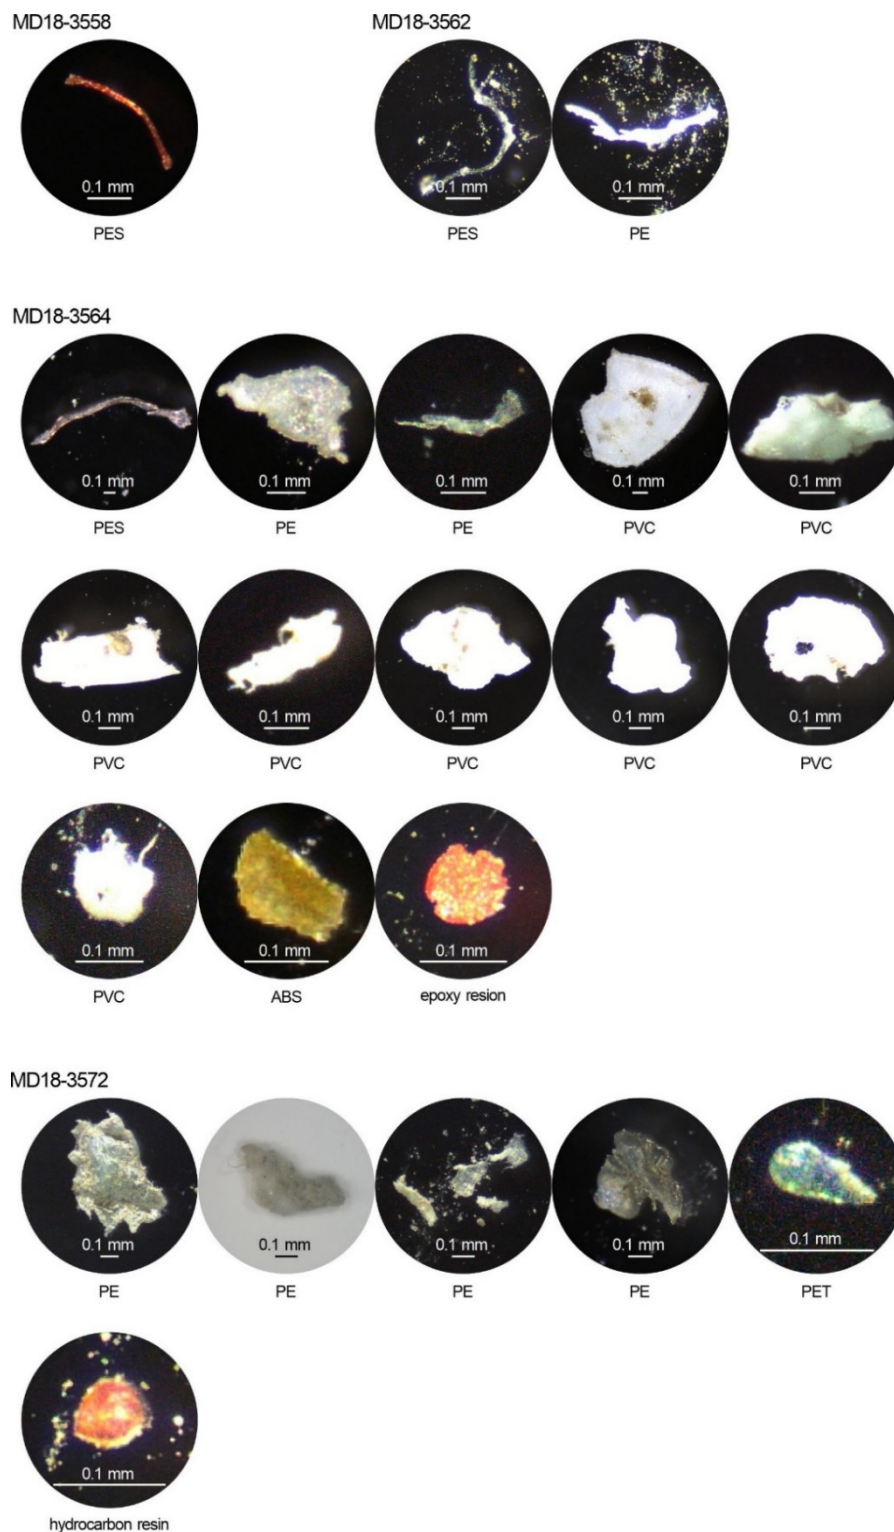

**Figure S3.** Photographs of all microplastics in surface sediments of the northern South China Sea. The fourth panel (PC) of sample FC3-1 contains the largest fragment (diameter 4.61 mm). The first panel (PES) of sample SW-B-4 contains the longest microfiber (length 5.36 mm). The sixth panel (hydrocarbon resin) of sample MD18-3572 contains the smallest bead (diameter 0.07 mm). The sixth panel (PC) of sample SW-B-4 contains six pieces of small fragments. The third panel (PE) of sample MD18-3572 contains one piece of fragment.



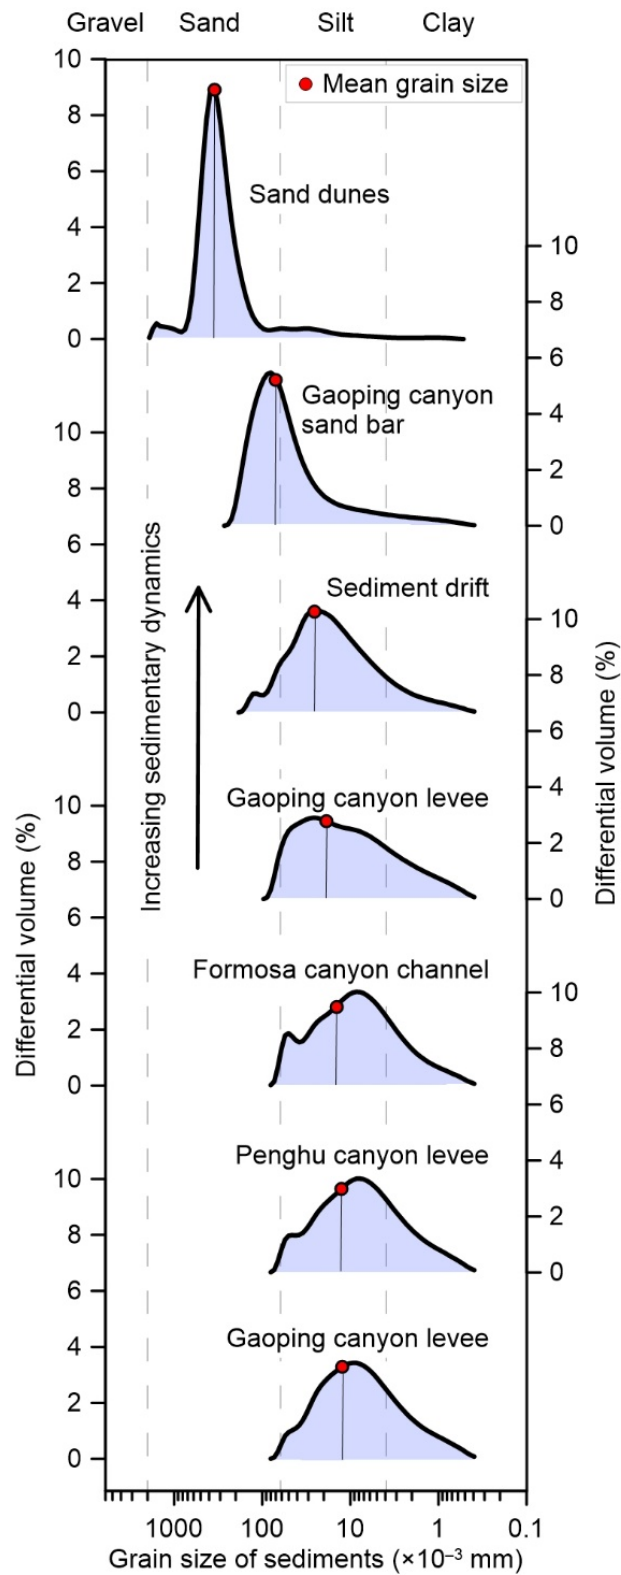

**Figure S4.** Grain-size frequency distribution of detrital fractions in surface sediments from typical deep-sea geomorphological units in the northern South China Sea.

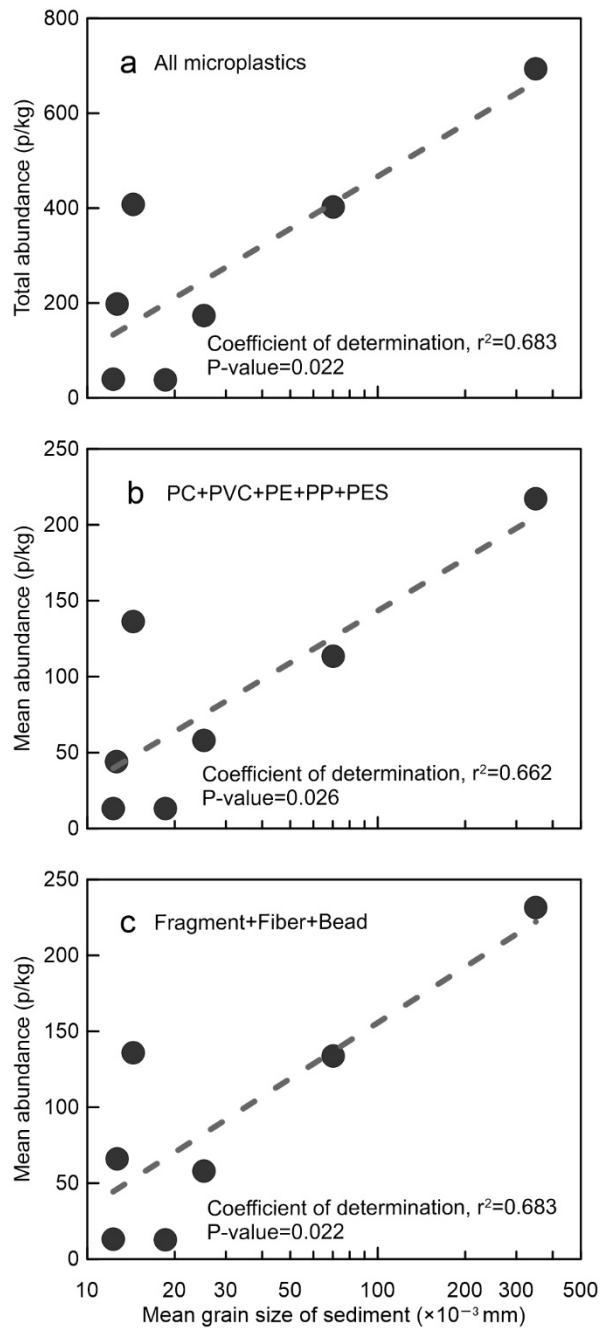

**Figure S5.** Pearson correlation analyses for the abundance of microplastics with the mean grain size of detrital sediments.

(a) Total abundance of microplastics. (b) Mean abundance of PC, PVC, PE, PP, and PES. (c) Mean abundance of microplastic fragments, fibers, and beads. The horizontal axes (mean grain size of sediments) were transformed to logarithmic formats (Log base 10). The detailed data are shown in [Table S2](#). The dashed regression line shows the linear relationship between two variables (fit equation  $Y=B*\text{Log}(X)+A$ ). Coefficient of determination,  $r^2$ , indicates the strength of the linear correlation. P-value indicates the probability of a significant correlation (significance level 0.05). The P-value smaller than 0.05 usually suggests a significant correlation between two variables.



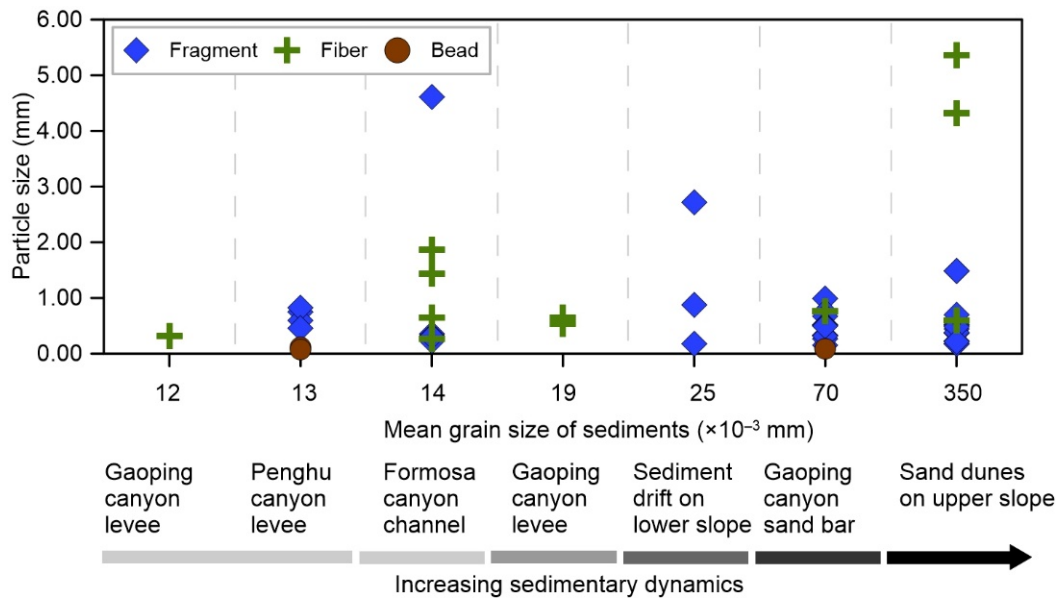

**Figure S6.** Particle size distribution of microplastic fragments, fibers, and beads.

Deep-sea geomorphological units are arranged along the horizontal axis based on the mean grain size of detrital sediments, representing gradual increasing sedimentary dynamic intensity of the geomorphological units.

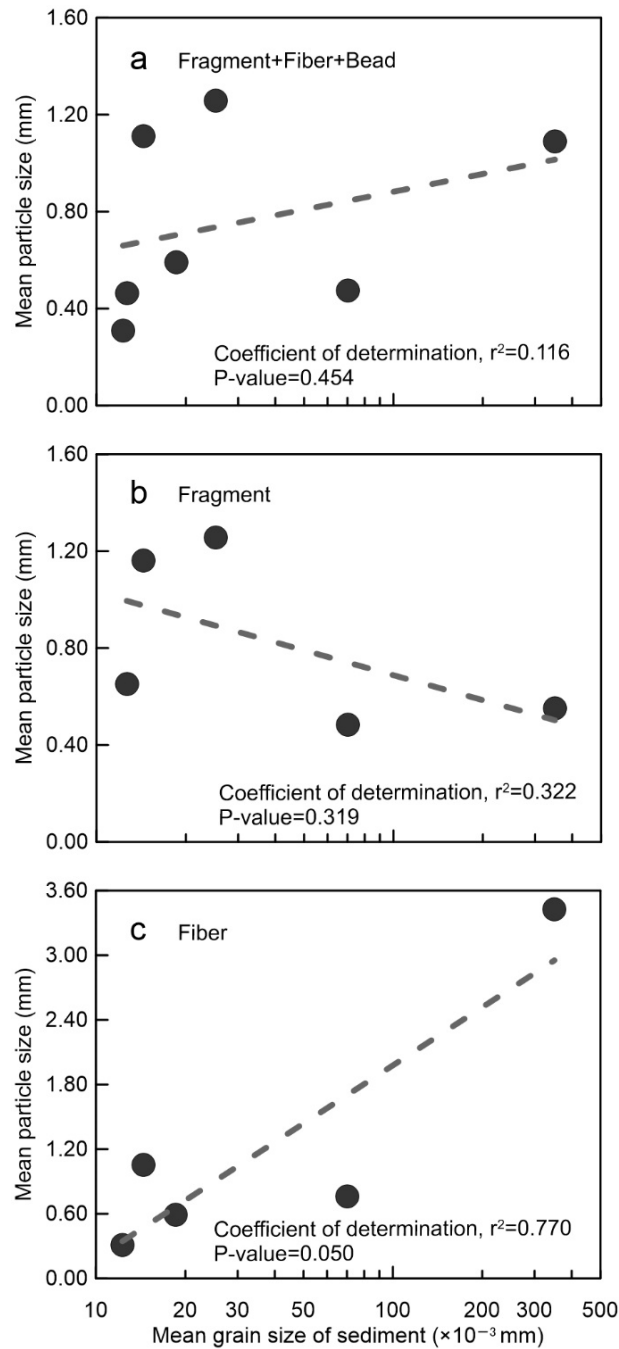

**Figure S7.** Pearson correlation analyses for the particle size of microplastics with the mean grain size of detrital sediments.

(a) Mean particle size of microplastic fragments, fibers, and beads. (b) Mean particle size of microplastic fragments. (c) Mean particle size of microplastic fibers. The horizontal axes (mean grain size of sediments) were transformed to logarithmic formats (Log base 10). The detailed data are shown in [Table S2](#). The dashed regression line shows the linear relationship between two variables (fit equation  $Y=B*\text{Log}(X)+A$ ). Coefficient of determination,  $r^2$ , indicates the strength of the linear correlation. P-value indicates the probability of a significant correlation (significance level 0.05). The P-values in plots ( $\geq 0.050$ ) suggest insignificant correlations between microplastic particle size and sediment grain size.
